# Supplementary material for: EH-myomesin splice isoform is a novel marker for dilated cardiomyopathy
Source: PubMed Central journal article supplement — Basic Res Cardiol. 2010 Nov 11;106(2):233–47. doi: 10.1007/s00395-010-0131-2 (PMC3032906; doi:10.1007/s00395-010-0131-2), 2010-11-11
Supplement: 395_2010_131_MOESM1_ESM.pdf [file 395_2010_131_MOESM1_ESM.pdf]

## Supplementary Material

Figure S1

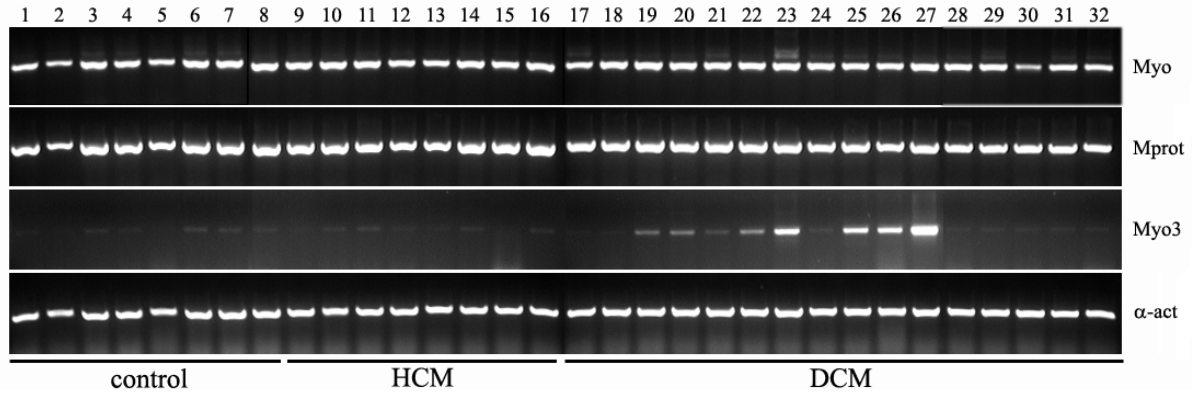

### *Expression of myomesin, M-protein and myomesin 3 genes in mouse cardiomyopathy models.*

Total RNA extracted from mouse heart was used for RT-PCR analysis. Different sets of primers were used to detect myomesin (Myo), M-protein (Mprot), myomesin 3 (Myo3) and  $\alpha$ -actinin as a control ( $\alpha$ -act). Lanes 1–8: heart (left ventricle) extracts of control mice at the age of 2 weeks (lane 1), 1 month (lane 2), 1.5 months (lane 3), 2 months (lane 4) and 4 months (lanes 5–8). Lanes 9–16: heart (left ventricle) extracts of mouse models with a hypertrophic cardiomyopathy phenotype (age: 4 months; isoproterenol-treated mice (lanes 9–11) [3], angiotensinII overexpressing mice (lanes 12–13) [4], one-kidney-one-clip (1k1c) mouse hypertension model (14–16) [9]. Lanes 17–32: heart (left ventricle) extracts of mouse models which develop dilated cardiomyopathy: myosin binding protein C (MyBPC) transgenic mice (age: 1 month, lanes 17–18) [5], retinoic acid receptor (RAR) overexpressing mice (age: 2 months, lanes 19–20; age: 4 months, lane 21) [2], dystrophin knockout (mdx) mice (age: 4 months, lane 22), [6] tropomodulin-overexpressing transgenic (TOT) mice (age: 4 months, lane 23) [8], muscle LIM protein (MLP) knockout mice at the age of 2 weeks (lane 24), 1 month (lane 25), 2 months (lane 26), 4 months (lane 27) [1] and the  $c\Delta ex3$   $\beta$ -catenin mice at the age of 2 weeks (lane 28), 1 month (lane 29), 2 months (lane 30) and 4 months (lanes 31–32). Myomesin and M-protein transcripts can be detected in all heart samples at similar levels, whereas the myomesin 3 transcript is upregulated in most of the dilated hearts with the highest levels in the MLP KO and TOT mice.

**Figure S2**

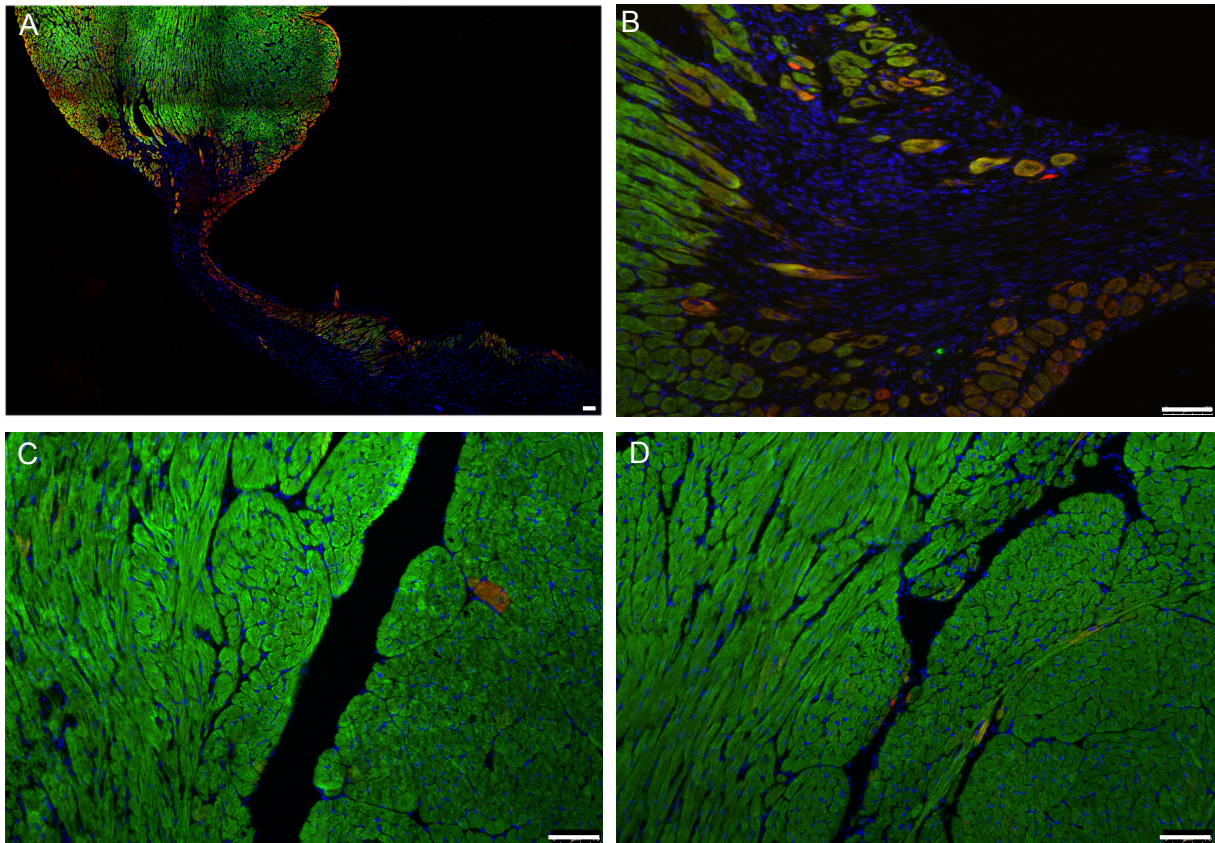

*EH-myomesin is upregulated in the scar area of the mouse heart remodeled after myocardial infarction*

Cryosections of mouse heart ventricles 4 weeks after induction of myocardial infarction due to left anterior descending artery (LAD) ligation (A, B) were stained with antibodies against M-protein (green), EH-myomesin (red) and with DAPI (blue). As controls, ventricular sections of sham operated mice (C) and of the non-infarcted region (D) of the LAD ligation mouse model have been used. EH-myomesin (red) is accumulated in the scar area of the heart remodeled after myocardial infarction (red in A and B) compared to control hearts (C) and non-infarcted region (D) whereas M-protein (green) shows a lower expression level in the infarcted part. In the infarcted region, many non-cardiomyocytes (e.g. fibroblasts) negative for M-protein or EH-myomesin demonstrate fibrotic tissue. Echocardiography showed a drastic reduction of heart function in the LAD ligation model (21.4 % ejection fraction) compared to the sham operated mice (51.5 % ejection fraction). The left ventricular mass / body weight ratio (mg/g) was clearly increased in the LAD ligation model (5,71) compared to sham controls (3.56). Age of the mice at date of echocardiography: 14 weeks. Scale bar: 75  $\mu$ m.

**Figure S3**

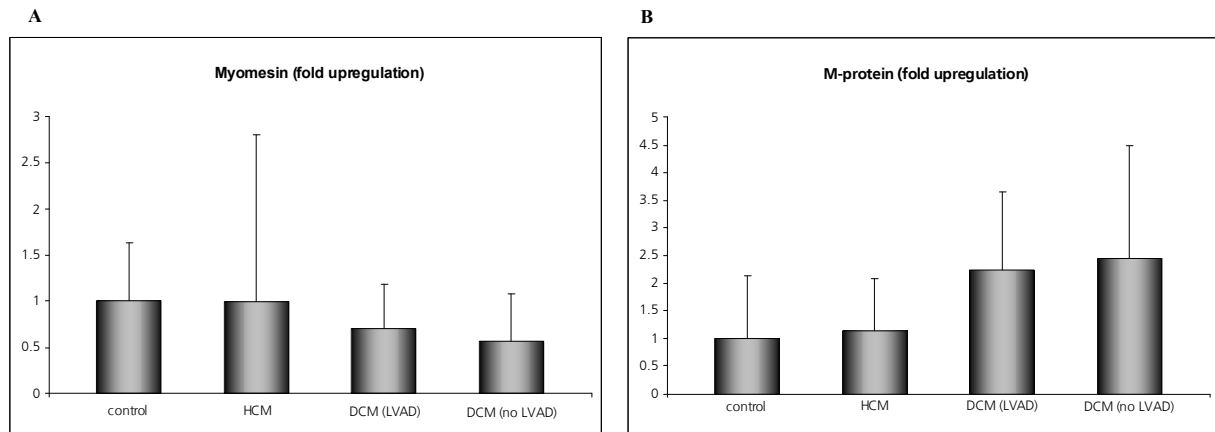

*Total myomesin and M-protein expression is not altered in human patients suffering from DCM.*

RT-qPCR analysis of human patients suffering from DCM or HCM using primers specific for myomesin (A) and M-protein (B). The total expression of these genes is not significantly changed in the hearts of patients suffering from DCM (N=13) compared to non-dilated control hearts (N=5) and hearts of patients suffering from HCM (N=7).  $\alpha$ -actinin was used for normalization. Contr.=control, HCM=hypertrophic cardiomyopathy, DCM=dilated cardiomyopathy, LVAD=left ventricular assist device. Error bars represent the standard deviation.

**Figure S4**

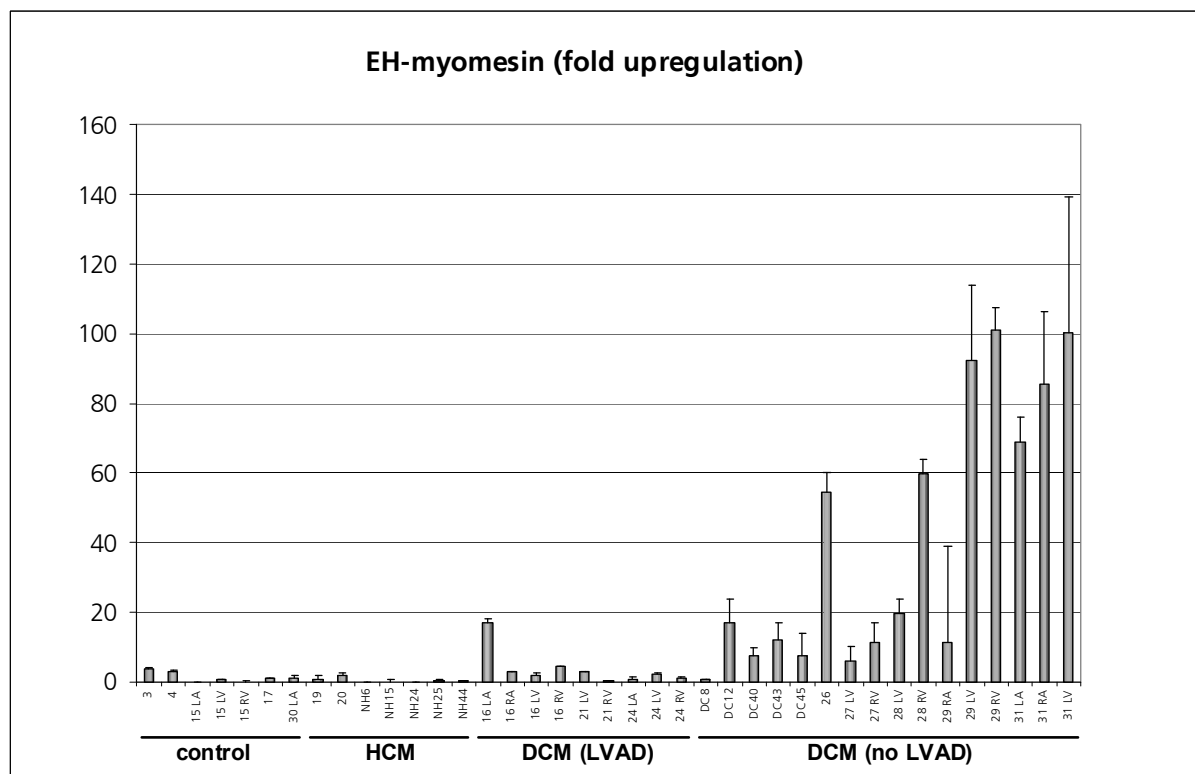

*EH-myomesin is up-regulated in human DCM patients*

RT-qPCR analysis of human patients suffering from DCM or HCM using primers specific for EH-myomesin. This isoform is clearly upregulated in the hearts of patients (N=10) suffering from DCM (right columns)

compared to non-dilated control hearts (N=5) and hearts of patients suffering from HCM (N=7). DCM patients under treatment with a left ventricular assist device (LVAD, N=3) show no significant re-expression of the EH-myomesin isoform.  $\alpha$ -actinin was used for normalization. Contr.=control, HCM=hypertrophic cardiomyopathy, DCM=dilated cardiomyopathy, LVAD=left ventricular assist device, LV=left ventricle, RV=right ventricle, LA=left atrium, RA=right atrium. Error bars represent the standard deviation of triplicate measurements.

**Figure S5**

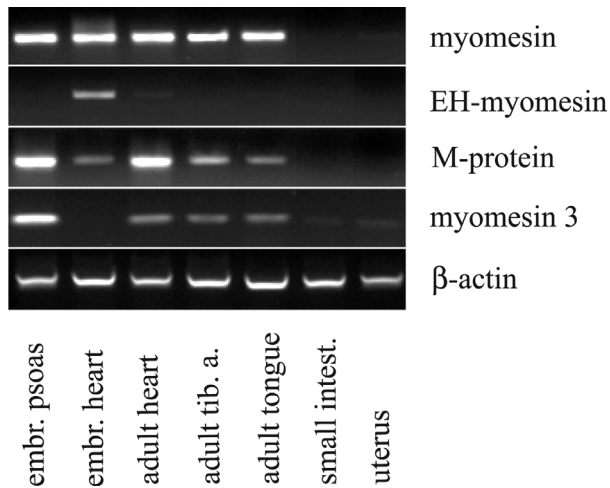

*Expression of myomesin, M-protein and myomesin-3 genes in human tissues.*

Different human muscle tissues were analysed by RT-PCR using primers specific for all myomesin family members. Myomesin can be detected in all types of human striated muscle but not in smooth muscle, in agreement to the RT-PCR analysis of mouse tissues [7]. A primer specific for the EH-segment of human was used to confirm the presence of EH-myomesin in the human embryonic heart. High levels of M-protein mRNA are found in embryonic skeletal muscle (psoas) and adult heart, in addition it can be found in adult m. tibialis anterior, tongue and traces in the embryonic heart. The myomesin-3 transcript can be detected not only in skeletal muscle with the highest level in the embryo (embryonic psoas), but also in the adult heart. In addition, adult human m. tibialis anterior and tongue show expression of myomesin-3 mRNA. In smooth muscle (small intestine and uterus), none of the myomesin genes is expressed.  $\beta$ -actin was used as loading control.

**Table S1:***Primers used for RT-PCR*

| Primer Name       | Species | Exon | Sequence                | Product Size                        |
|-------------------|---------|------|-------------------------|-------------------------------------|
| Myomesin_fwd      | Mouse   | 15   | TGACCGTCGTAGGGGACAAACT  | 652 bp<br>(EH-mm)<br>358 bp<br>(mm) |
| Myomesin_rev      | Mouse   | 18   | TCAAGACAAGTGATGTCATAGG  |                                     |
| M-Protein_fwd     | Mouse   | 4    | CGGTCTCAAGCGGCTTCTTACG  | 466 bp                              |
| M-Protein_rev     | Mouse   | 7    | CCACCGCAGCATTGGTAGACAC  |                                     |
| Myomesin-3_fwd    | Mouse   | 10   | GCAGATACTCTACGCAGACCGC  | 446 bp                              |
| Myomesin-3_rev    | Mouse   | 12   | CCGTGACAACTGCTTCTGAGGC  |                                     |
| Actinin_fwd       | Mouse   | 10   | GGTGCAGGAGAAGTGCCAGCTG  | 400 bp                              |
| Actinin_rev       | Mouse   | 12   | CTCCTGCGCAATGGCAGCGATC  |                                     |
| Myomesin_ex34_fwd | Human   | 34   | GAAGACAGTGGATCTCTCTGGA  | 247 bp                              |
| Myomesin_ex38_rev | Human   | 38   | GAAGTGTGAGTTGCAGTGGTC   |                                     |
| EH-Myomesin_fwd   | Human   | EH   | GAGCGATGAGCCTGGTGGACTA  | 315 bp                              |
| Myomesin_ex18_rev | Human   | 18   | AGAACCATTGAGTCACGAAAAC  |                                     |
| M-Protein_fwd     | Human   | 3    | CACAGAGAGCCTCCAGCCAGAC  | 287 bp                              |
| M-Protein_rev     | Human   | 5    | CCGCTCTCAAATGTGTGTCTC   |                                     |
| Myomesin-3_fwd    | Human   | 5    | GCCGTCTGGGAGCACACCACGGT | 149 bp                              |
| Myomesin-3_rev    | Human   | 6    | AGCAGCCCGTAGTTGTTGGTGAT |                                     |
| Actinin_fwd       | Human   | 13   | GGAACGCTTACTCAGAAGAGGA  | 286 bp                              |
| Actinin_rev       | Human   | 15   | AGCTCTGAATCACCTTCTCCAC  |                                     |

Abbreviations: fwd: forward; rev: reverse; EH embryonic heart; mm Myomesin; bp base pairs.

**Table S2:**

| DCM mouse model           | % EH-myomesin |
|---------------------------|---------------|
| $\beta$ -cat $\Delta$ ex3 | 436 $\pm$ 212 |
| MLP KO                    | 218 $\pm$ 54  |
| RAR                       | 355 $\pm$ 117 |
| TOT                       | 550           |

All 4 DCM mouse models tested by Western blot analysis show a clear accumulation of the EH-myomesin isoform in the heart ventricle compared to age-matched (2 months) control mice. Tested models:  $\beta$ -catenin  $\Delta$ exon3 ( $\beta$ -cat $\Delta$ ex3), muscle LIM protein knockout mice (MLP KO), retinoic acid receptor overexpressing mice (RAR), tropomodulin-overexpressing transgenic mice (TOT).

## References

1. Arber S, Hunter JJ, Ross JJ, Hongo M, Sansig G, Borg J, Perriard JC, Chien KR, Caroni P (1997) MLP-deficient mice exhibit a disruption of cardiac cytoarchitectural organization, dilated cardiomyopathy, and heart failure. *Cell* 88:393-403
2. Colbert MC, Hall DG, Kimball TR, Witt SA, Lorenz JN, Kirby ML, Hewett TE, Klevitsky R, Robbins J (1997) Cardiac compartment-specific overexpression of a modified retinoic acid receptor produces dilated cardiomyopathy and congestive heart failure in transgenic mice. *J Clin Invest* 100:1958-1968
3. Kudej RK, Iwase M, Uechi M, Vatner DE, Oka N, Ishikawa Y, Shannon RP, Bishop SP, Vatner SF (1997) Effects of chronic beta-adrenergic receptor stimulation in mice. *J Mol Cell Cardiol* 29:2735-2746
4. Mazzolai L, Pedrazzini T, Nicoud F, Gabbiani G, Brunner HR, Nussberger J (2000) Increased cardiac angiotensin II levels induce right and left ventricular hypertrophy in normotensive mice. *Hypertension* 35:985-991
5. McConnell BK, Jones KA, Fatkin D, Arroyo LH, Lee RT, Aristizabal O, Turnbull DH, Georgakopoulos D, Kass D, Bond M, Niimura H, Schoen FJ, Conner D, Fischman DA, Seidman CE, Seidman JG (1999) Dilated cardiomyopathy in homozygous myosin-binding protein-C mutant mice. *J Clin Invest* 104:1235-1244
6. Quinlan JG, Hahn HS, Wong BL, Lorenz JN, Wenisch AS, Levin LS (2004) Evolution of the mdx mouse cardiomyopathy: physiological and morphological findings. *Neuromuscul Disord* 14:491-496
7. Schoenauer R, Lange S, Hirschy A, Ehler E, Perriard JC, Agarkova I (2008) Myomesin 3, a novel structural component of the M-band in striated muscle. *J Mol Biol* 376:338-351
8. Sussman MA, Welch S, Cambon N, Klevitsky R, Hewett TE, Price R, Witt SA, Kimball TR (1998) Myofibril degeneration caused by tropomodulin overexpression leads to dilated cardiomyopathy in juvenile mice. *J Clin Invest* 101:51-61
9. Wiesel P, Mazzolai L, Nussberger J, Pedrazzini T (1997) Two-kidney, one clip and one-kidney, one clip hypertension in mice. *Hypertension* 29:1025-1030
